# Supplementary material for: Enhancing the Photocatalytic Activity of Immobilized TiO2 Using Laser-Micropatterned Surfaces
Source: MDPI journal article supplement (doi:10.3390/app14073033), 2024-04-04
Supplement: s1 [file s1]

# Enhancing the Photocatalytic Activity of Immobilized TiO<sub>2</sub> Using Laser-Micropatterned Surfaces

Theodoros Giannakis <sup>1,2</sup>, Sevasti-Kiriaki Zervou <sup>3</sup>, Theodoros M. Triantis <sup>3</sup>, Christophoros Christophoridis <sup>3,4,\*</sup>, Erasmia Bizani <sup>4,5</sup>, Sergey V. Starinskiy <sup>1</sup>, Panagiota Koralli <sup>1</sup>, Georgios Mousdis <sup>1</sup>, Anastasia Hiskia <sup>3</sup> and Maria Kandyla <sup>1,\*</sup>

<sup>1</sup> Theoretical and Physical Chemistry Institute, National Hellenic Research Foundation, 48 Vasileos Constantinou Avenue, 11635 Athens, Greece; thgiannakis@eie.gr (T.G.); staris@eie.gr (S.S.); pkoralli@eie.gr (P.K.); gmousdis@eie.gr (G.M.)

<sup>2</sup> Department of Physics, National and Kapodistrian University of Athens, University Campus, Zografou, 15784 Athens, Greece

<sup>3</sup> Photo-Catalytic Processes and Environmental Chemistry Laboratory, Institute of Nanoscience and Nanotechnology, NCSR DEMOKRITOS, Neapoleos 27, Agia Paraskevi, 15341 Athens, Greece; s.zervou@inn.demokritos.gr (S.-K.Z.); t.triantis@inn.demokritos.gr (T.M.T.); a.hiskia@inn.demokritos.gr (A.H.)

<sup>4</sup> Greener than Green Technologies S.A., 13 Ilission St., Kifisia, 14564 Athens, Greece

<sup>5</sup> Analytical Chemistry Laboratory, Chemistry Department, National and Kapodistrian University, University Campus, Zografou, 15784 Athens, Greece; eribizani@chem.uoa.gr

\* Correspondence: c.christoforidis@inn.demokritos.gr (C.C.); kandyla@eie.gr (M.K.)

**Table S1.** : MS/MS detection parameters of atrazine and its TPs, 2,4,6-trichlorophenol and bisphenol-a.

| Compound                                                         | Precursor ion ( <i>m/z</i> ) | Product ion ( <i>m/z</i> ) | Collision energy (eV) |
|------------------------------------------------------------------|------------------------------|----------------------------|-----------------------|
| Atrazine                                                         | 216.0                        | 104.0                      | 31                    |
|                                                                  | [M+H] <sup>+</sup>           | 174.0                      | 17                    |
| Atrazine-d5<br>(IS)                                              | 221.1                        | 179.0                      | 17                    |
|                                                                  | [M+H] <sup>+</sup>           |                            |                       |
| 2-hydroxy-4,6-diamino-s-triazine (OAAT)                          | 128.0                        | 62.0                       | 30                    |
|                                                                  | [M+H] <sup>+</sup>           | 98.0                       | 30                    |
| 2-hydroxy-4-hydroxy-6-amino-s-triazine<br>(OOAT)                 | 129.0                        | 86.0                       | 30                    |
|                                                                  | [M+H] <sup>+</sup>           | 98.0                       | 30                    |
| 2,4,6-thihydroxy-s-triazine<br>(OOOT)                            | 130.0                        | 69.0                       | 30                    |
|                                                                  | [M+H] <sup>+</sup>           | 86.0                       | 30                    |
| 2-chloro-4,6-diamino-s-triazine (CAAT)                           | 146.0                        | 68.0                       | 30                    |
|                                                                  | [M+H] <sup>+</sup>           | 104.0                      | 30                    |
| 2-chloro-4-amino-6-(ethylamino)-s-triazine<br>(CAET)             | 174.0                        | 104.0                      | 31                    |
|                                                                  | [M+H] <sup>+</sup>           | 132.0                      | 17                    |
| 2-chloro-4-(isopropylamino)-6-amino-s-triazine<br>(CIAT)         | 188.0                        | 104.0                      | 25                    |
|                                                                  | [M+H] <sup>+</sup>           | 146.0                      | 15                    |
| 2-hydroxy-4-(isopropylamino)-6-(ethylamino)-s-triazine<br>(OIET) | 198.0                        | 86.0                       | 24                    |
|                                                                  | [M+H] <sup>+</sup>           | 114.0                      | 22                    |
| 2,4,6-Trichlorophenol                                            | 196.9                        | 161.0                      | 25                    |
|                                                                  | [M-H] <sup>-</sup>           |                            |                       |
| Bisphenol-a                                                      |                              | 93.0                       | 44                    |
|                                                                  | 227.0                        | 133.1                      | 31                    |
|                                                                  | [M-H] <sup>-</sup>           | 211.1                      | 34                    |
|                                                                  |                              | 212.1                      | 20                    |

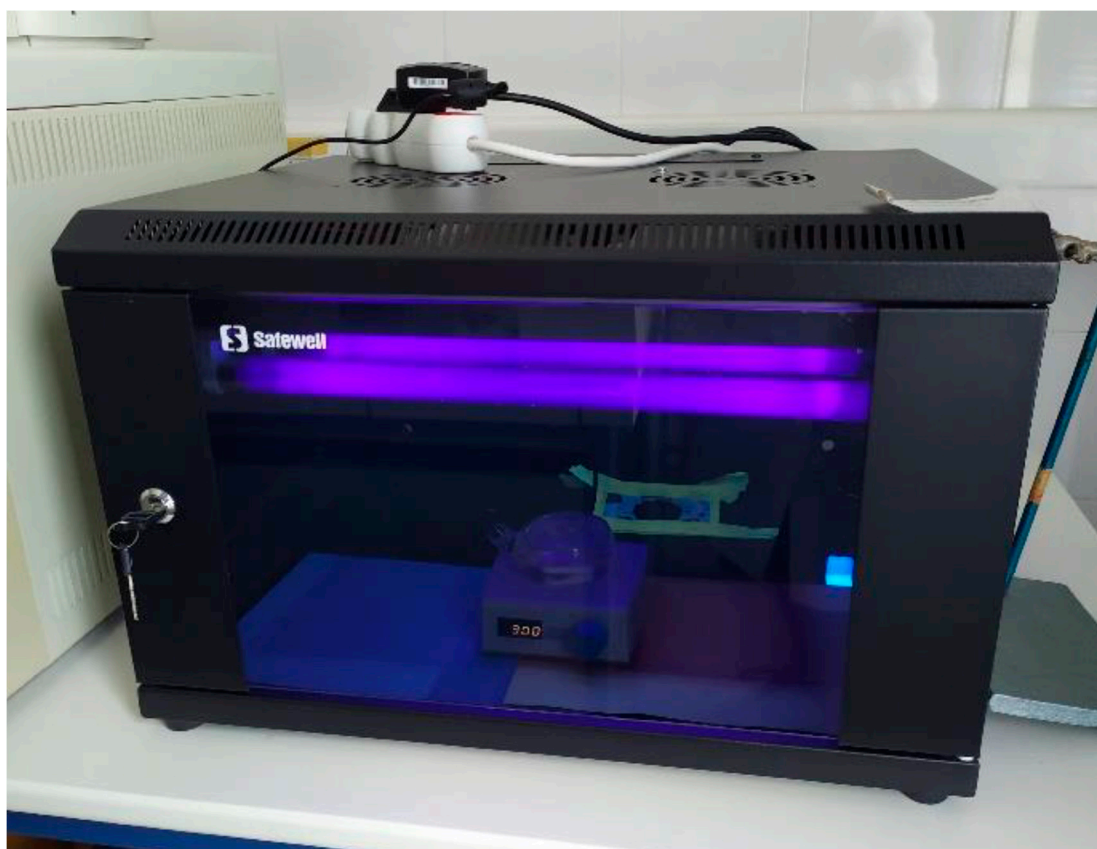

Figure S1. Illumination box equipped with UVA lamps.

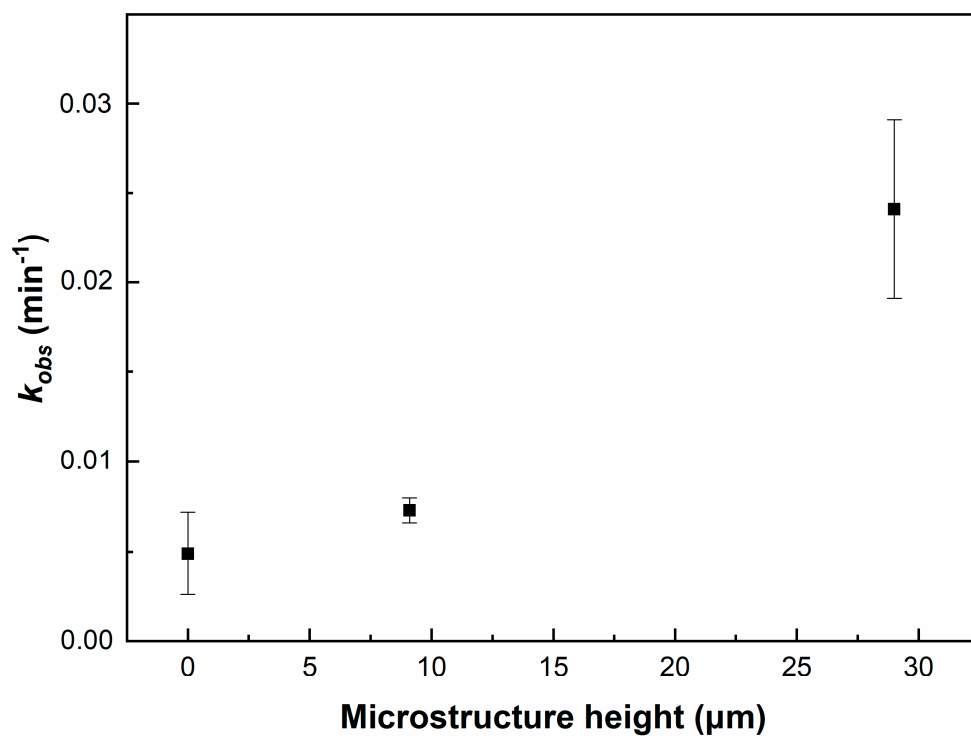

Figure S2. Dependence of photocatalytic rate constant on substrate microstructure size.

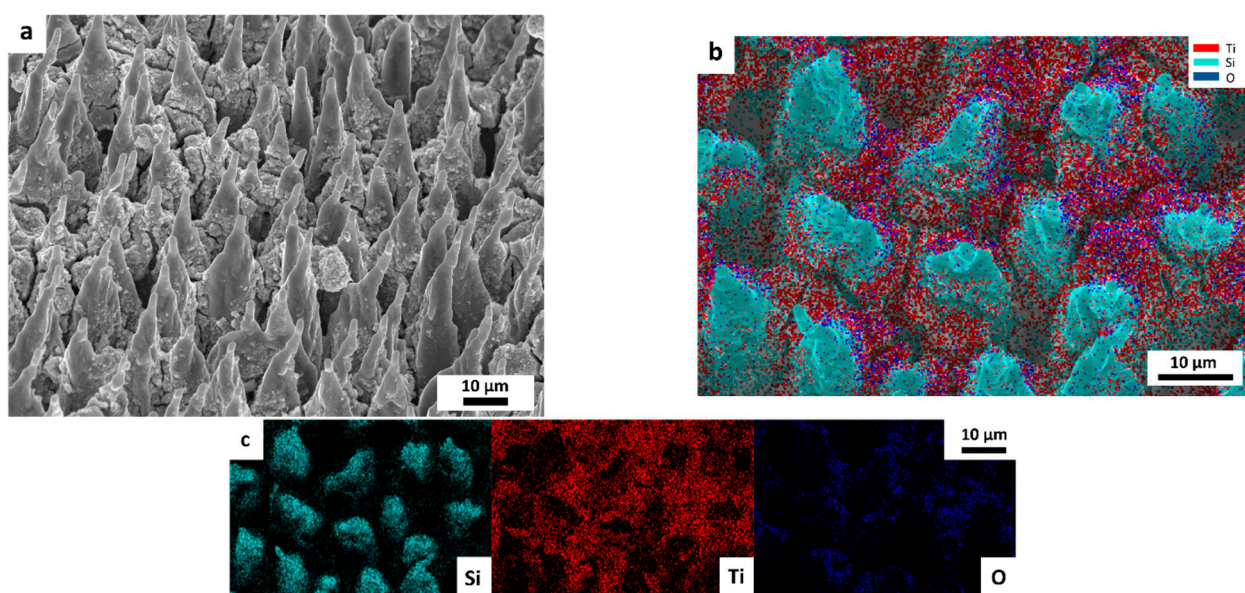

**Figure S3.** (a) SEM image at side (45°) view and (b) layered EDX image of TiO<sub>2</sub> + Degussa film on silicon microcones. (c) Mapping distribution of elements.

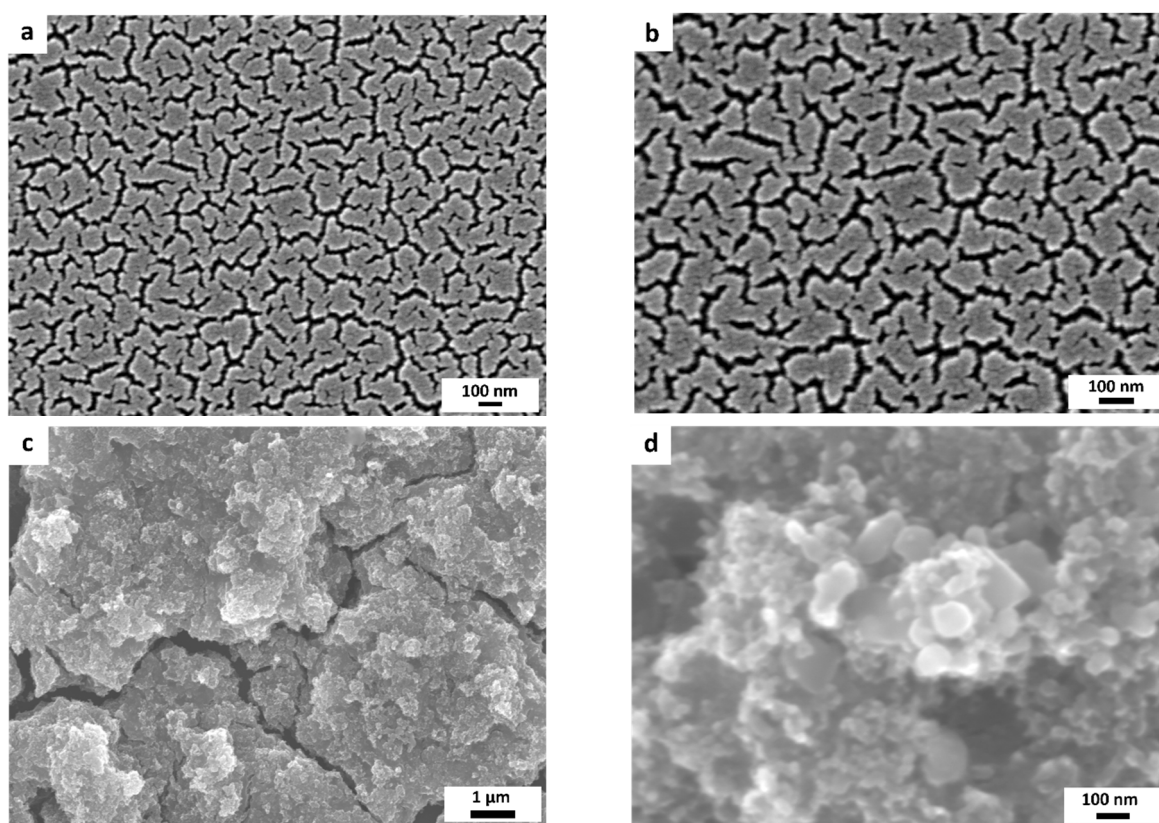

**Figure S4.** SEM images of (a),(b) TiO<sub>2</sub> and (c),(d) TiO<sub>2</sub> + Degussa thin films on flat silicon substrates after photocatalysis experiments.



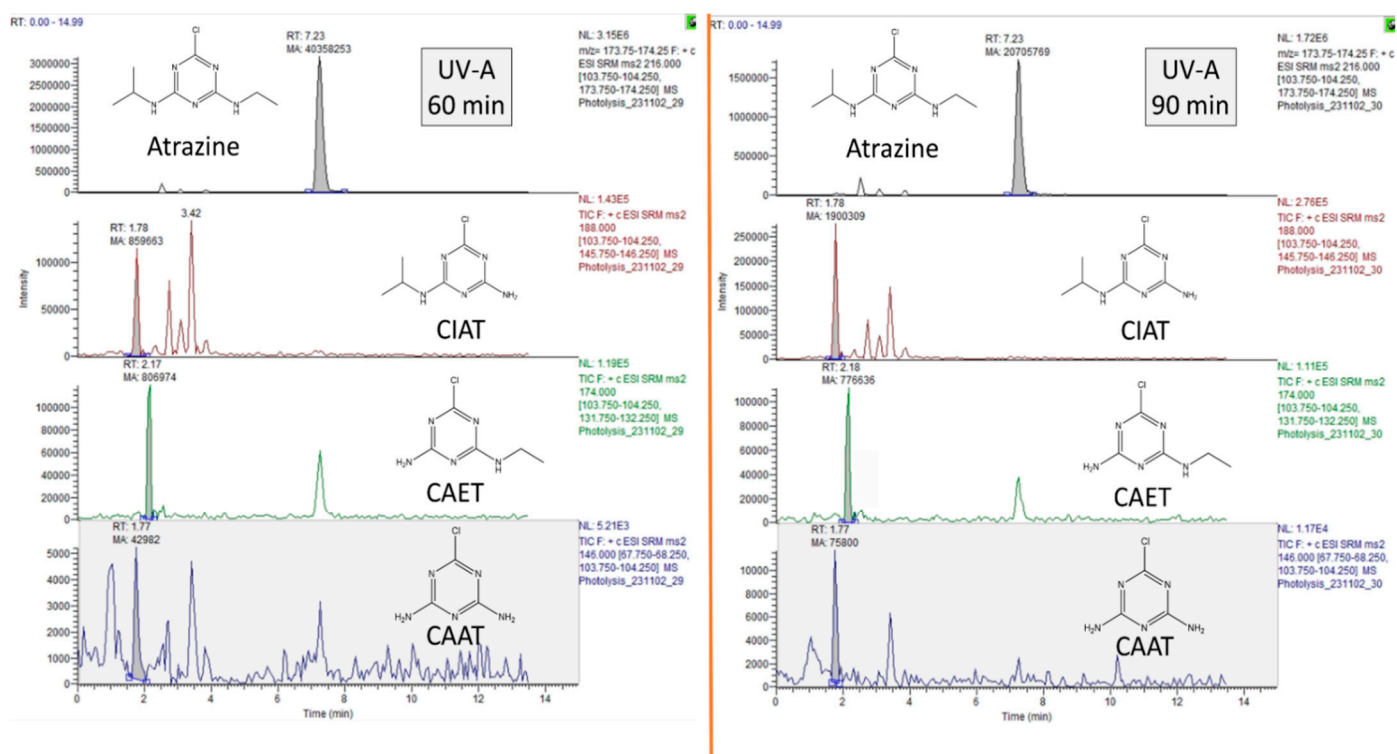

**Figure S5.** MRM chromatograms of atrazine and its transformation products that formed during the photocatalysis under UV-A irradiation ( $\lambda_{max} = 365$  nm) at 60 and 90 min, in the presence of M-Si-solgel photocatalytic surface.

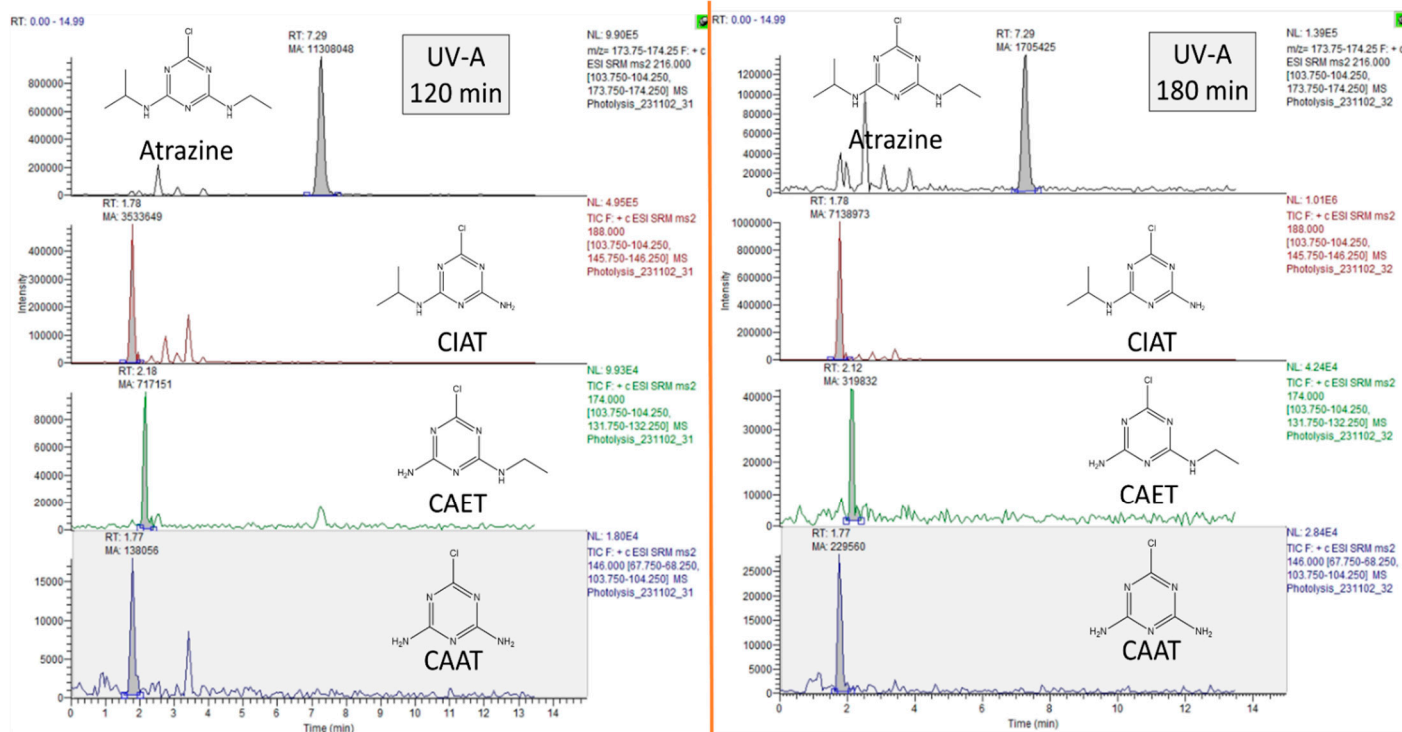

**Figure S6.** MRM chromatograms of atrazine and its transformation products that formed during the photocatalysis under UV-A irradiation ( $\lambda_{max} = 365$  nm) at 120 and 180 min, in the presence of M-Si-solgel photocatalytic surface.

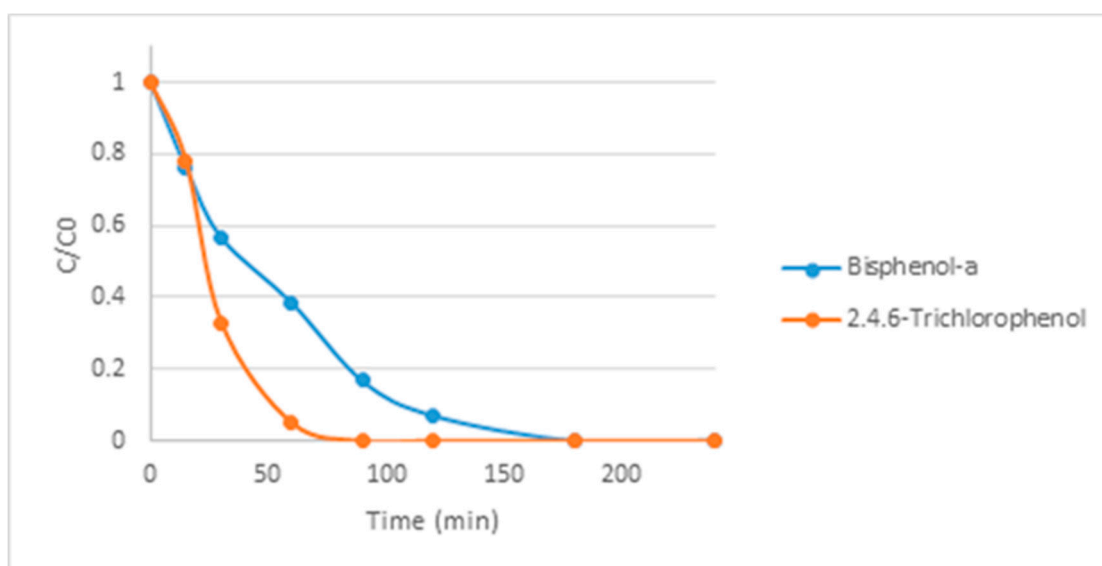

**Figure S7.** Photocatalytic degradation of bisphenol-a ( $C_0=0.131 \mu\text{mol/L}$ ) and 2,4,6-trichlorophenol ( $C_0=0.152 \mu\text{mol/L}$ ) under UV-A irradiation using the photocatalytic surface M-Si-solgel.
